# Supplementary material
Source: ML conference proceedings conference paper supplement (https://proceedings.mlr.press/v161/klaska21a.html)
Supplement: Supplementary file 1 [file klaska21a-supp.pdf]

---

# Supplementary Material for Regstar: Efficient Strategy Synthesis for Adversarial Patrolling Games (Supplementary material)

---

David Klaška<sup>1</sup>

Antonín Kučera<sup>1</sup>

Vít Musil<sup>1</sup>

Vojtěch Řehák<sup>1</sup>

<sup>1</sup>Faculty of Informatics, Masaryk University, Brno, Czech Republic

## A PROOF OF THEOREM 1

In this section, we show that Theorem 1 holds even for a special type of *deterministic-update* regular strategies where, for all  $(v, m) \in \tilde{V}$  and  $v' \in V$ , there is at most one  $m'$  such that  $\sigma((v, m), (v', m')) > 0$ .

For the rest of this section, we fix a patrolling graph  $G = (V, T, E, \text{time}, d, \alpha, \beta)$ . We say that a strategy  $\gamma$  is *optimal* if  $\text{Val}_G(\gamma) = \text{Val}_G$ . The existence of optimal strategies in patrolling games has been proven in Brázdil et al. [2015].

For a strategy  $\gamma$  and  $o = v_1, \dots, v_n, v_n \rightarrow v_{n+1} \in \Omega$ , let  $\gamma[o]$  be a strategy that starts in  $v_n$  by selecting the edge  $v_n \rightarrow v_{n+1}$  with probability one, and for every finite path of the form  $v_n, v_{n+1}, \dots, v_{n+k+1}$  where  $k \geq 1$  we have that  $\gamma[o](v_n, v_{n+1}, \dots, v_{n+k+1}) = \gamma(v_1, \dots, v_{n+k+1})$ .

First, we need the following lemma.

**Lemma 1.** *Let  $\gamma$  be an optimal strategy and  $o \in \Omega$  such that  $\text{Prob}^\gamma(o) > 0$ . Then  $\gamma[o]$  is optimal.*

*Proof.* For every  $\ell \geq 1$ , let  $\Omega(\ell)$  be the set of all observations  $o = v_1, \dots, v_\ell, v_\ell \rightarrow v_{\ell+1}$  such that  $\text{Prob}^\gamma(o) > 0$ . Clearly, for every fixed  $\ell \geq 1$  we have that

$$\sum_{o \in \Omega(\ell)} \text{Prob}^\gamma(o) \cdot \text{Val}_G(\gamma[o]) \leq \text{Val}_G$$

because  $\text{Val}_G(\gamma[o]) \leq \text{Val}_G$  and  $\sum_{o \in \Omega(\ell)} \text{Prob}^\gamma(o) = 1$ . We show that

$$\text{Val}_G \leq \sum_{o \in \Omega(\ell)} \text{Prob}^\gamma(o) \cdot \text{Val}_G(\gamma[o]) \quad (1)$$

which implies  $\text{Val}_G = \sum_{o \in \Omega(\ell)} \text{Prob}^\gamma(o) \cdot \text{Val}_G(\gamma[o])$ , and hence  $\text{Val}_G(\gamma[o]) = \text{Val}_G$  for every  $o \in \Omega(\ell)$ .

It remains to prove (1). Since  $\text{Val}_G = \text{Val}_G(\gamma)$ , it suffices to show that, for an arbitrarily small  $\varepsilon > 0$ ,

$$\text{Val}_G(\gamma) \leq \varepsilon + \sum_{o \in \Omega(\ell)} \text{Prob}^\gamma(o) \cdot \text{Val}_G(\gamma[o]).$$

For every  $o \in \Omega(\ell)$ , let  $\pi_o$  be an Attacker's strategy such that  $\mathbb{E}U_D(\gamma[o], \pi_o) \leq \text{Val}_G(\gamma[o]) + \varepsilon$ . Consider another Attacker's strategy  $\hat{\pi}$  waiting for the first  $\ell$  moves and then "switching" to an appropriate  $\pi_o$  according to the corresponding observation. Then,

$$\begin{aligned} \text{Val}_G(\gamma) &\leq \mathbb{E}U_D(\gamma, \hat{\pi}) \\ &\leq \sum_{o \in \Omega(\ell)} \text{Prob}^\gamma(o) \cdot \mathbb{E}U_D(\gamma[o], \pi_o) \\ &\leq \sum_{o \in \Omega(\ell)} \text{Prob}^\gamma(o) \cdot (\text{Val}_G(\gamma[o]) + \varepsilon) \\ &= \varepsilon + \sum_{o \in \Omega(\ell)} \text{Prob}^\gamma(o) \cdot \text{Val}_G(\gamma[o]). \end{aligned}$$

This completes the proof of Lemma 1.  $\square$

*Proof of Theorem 1.* We show that for an arbitrarily small  $\varepsilon > 0$ , there exists a deterministic-update regular strategy  $\sigma_\varepsilon$  such that  $\text{Val}_G(\sigma_\varepsilon) \geq \text{Val}_G - \varepsilon$ .

Let  $d_{\max} = \max_{t \in T} d(t)$ , and  $\alpha_{\max} = \max_{r \in T} \alpha(r)$  and let an optimal Defender's strategy  $\gamma$  be fixed.

We say that two non-empty finite paths  $h, h' \in \mathcal{H}$  are  *$\delta$ -similar*, where  $\delta > 0$ , if the following conditions are satisfied:

- $h$  and  $h'$  end with the same vertex  $v$ ,
- $\text{Prob}^\gamma(h) > 0, \text{Prob}^\gamma(h') > 0$ ,
- for every target  $t$  and every  $\ell \in \{1, \dots, d_{\max}\}$ , the probabilities that  $\gamma$  successfully detects an ongoing attack at  $t$  in at most  $\ell$  time units after executing the histories  $h$  and  $h'$  differ at most by  $\delta$ .

Note that there are only *finitely many* pairwise non- $\delta$ -similar histories. More precisely, their total number is bounded from above by  $|V| \cdot (\lceil \delta^{-1} \rceil)^{d_{\max} \cdot |T|}$ .

Let us fix an arbitrarily small  $\varepsilon > 0$ , and let  $\delta = \varepsilon / \alpha_{\max}$ . Furthermore, let  $\kappa = |V| \cdot (\lceil \delta^{-1} \rceil)^{d_{\max} \cdot |T|}$ . We construct a regular deterministic-update strategy  $\sigma_\varepsilon$  as follows:

- Let  $H_\delta$  be the set of all finite paths  $h$  of length at most  $\kappa \cdot d_{\max}$  such that  $\text{Prob}^\gamma(h) > 0$  and for all proper prefixes  $h', h''$  of  $h$  whose length is a multiple of  $d_{\max}$  we have that if  $h', h''$  are  $\delta$ -similar, then  $h' = h''$ . For notation simplification, from now on we identify memory elements with such finite paths.
- For every eligible pair  $(v, h)$ , the distribution  $\sigma_\varepsilon(v, h)$  is determined in the following way:
  - If the length of  $h$  is a multiple of  $d_{\max}$  and there is a proper prefix  $h'$  of  $h$  where the length of  $h'$  is also a multiple of  $d_{\max}$  and the histories  $h, h'$  are  $\delta$ -similar, then  $\sigma_\varepsilon(v, h) = \sigma_\varepsilon(v, h')$  (since  $h'$  is shorter than  $h$ , we may assume that  $\sigma_\varepsilon(v, h')$  has already been defined).
  - Otherwise,  $\sigma_\varepsilon(v, h)$  is a distribution  $\mu \in \text{Dist}(V \times H_\delta)$  such that  $\mu(v', hv') = \text{Prob}^\gamma(hv') / \text{Prob}^\gamma(h)$  for every vertex  $v'$  such that  $hv' \in H_\delta$ . For the other pairs of  $V \times H_\delta$ , the distribution  $\mu$  returns zero.
- The initial distribution assigns  $\gamma(\lambda)(v)$  to every  $(v, v) \in V \times H_\delta$ . For the other pairs of  $V \times H_\delta$ , the initial distribution returns zero.

Intuitively, the strategy  $\sigma_\varepsilon$  mimics the optimal strategy  $\gamma$ , but at appropriate moments “cuts” the length of the history stored in its memory and starts to behave like  $\gamma$  for this shorter history. These intermediate “switches” may lower the overall protection, but since the shorter history is  $\delta$ -similar to the original one, the impact of these “switches” is very small.

More precisely, we show that, for an arbitrary Attacker’s strategy  $\pi$ ,  $\mathbb{E}U_D(\sigma_\varepsilon, \pi) \geq \mathbb{E}U_D(\gamma, \pi) - \varepsilon$ . Since  $\gamma$  is optimal, we obtain  $\mathbb{E}U_D(\sigma_\varepsilon, \pi) \geq \text{Val}_G - \varepsilon$ , hence  $\text{Val}_G(\sigma_\varepsilon) \geq \text{Val}_G - \varepsilon$  as required. For the rest of this proof, we fix an Attacker’s strategy  $\pi$ . For every target  $\tau$ , let  $\pi_\tau$  be an Attacker’s strategy such that  $\pi_\tau(u \rightarrow v) = \text{attack}_\tau$  for every edge  $u \rightarrow v$ , i.e.,  $\pi_\tau$  attacks  $\tau$  immediately. Furthermore, let  $\text{Att}(\pi, \tau)$  be the set of all observations  $o$  such that  $\text{Prob}^{\sigma_\varepsilon}(o) > 0$  and  $\pi(o) = \text{attack}_\tau$ . We have the following:

$$\begin{aligned}
& \mathbb{E}U_A(\sigma_\varepsilon, \pi) \\
&= \sum_{\tau \in T} \sum_{o \in \text{Att}(\pi, \tau)} \text{Prob}^{\sigma_\varepsilon}(o) \cdot (\alpha(\tau) - \mathbf{P}^{\sigma_\varepsilon}(\tau \mid o)) \\
&= \sum_{\tau \in T} \sum_{o \in \text{Att}(\pi, \tau)} \text{Prob}^{\sigma_\varepsilon}(o) \cdot \mathbb{E}U_A(\sigma_\varepsilon[o], \pi_\tau)
\end{aligned}$$

Here,  $\sigma_\varepsilon[o]$ , where  $o = v_1, \dots, v_n, v_n \rightarrow v_{n+1}$ , is a strategy that starts in  $v_n$  by executing the edge  $v_n \rightarrow v_{n+1}$ , and then behaves identically as  $\sigma_\varepsilon$  after the history  $o$  (since  $\sigma_\varepsilon$  is deterministic-update, the associated memory elements are determined uniquely by  $o$ ).

Now, realize that for every  $o \in \text{Att}(\pi, \tau)$ , there exists an observation  $o'$  (stored in the finite memory of  $\sigma_\varepsilon$ ) such that  $\text{Prob}^\gamma(o') > 0$  and the strategy  $\sigma_\varepsilon[o]$  “mimics” the strategy  $\gamma[o']$  until the finite path stored in the memory of  $\sigma_\varepsilon$  is “cut” into a shorter path in the way described above. Since at most one such “cut” is performed during the first  $d_{\max}$  steps and the shorter path obtained by the cut is  $\delta$ -similar to the original one, we obtain that the difference between  $\mathbb{E}U_A(\sigma_\varepsilon[o], \pi_\tau)$  and  $\mathbb{E}U_A(\gamma[o'], \pi_\tau)$  is at most  $\varepsilon$ .

By Lemma 1, we obtain  $\mathbb{E}U_D(\gamma[o'], \pi_\tau) \geq \text{Val}_G$ , hence  $\mathbb{E}U_A(\gamma[o'], \pi_\tau) \leq \alpha_{\max} - \text{Val}_G$  and  $\mathbb{E}U_A(\sigma_\varepsilon[o], \pi_\tau) \leq \alpha_{\max} - \text{Val}_G + \varepsilon$ . This gives

$$\begin{aligned}
& \mathbb{E}U_A(\sigma_\varepsilon, \pi) \\
&\leq \sum_{\tau \in T} \sum_{o \in \text{Att}(\pi, \tau)} \text{Prob}^{\sigma_\varepsilon}(o) \cdot (\alpha_{\max} - \text{Val}_G + \varepsilon) \\
&= (\alpha_{\max} - \text{Val}_G + \varepsilon) \cdot \sum_{\tau \in T} \sum_{o \in \text{Att}(\pi, \tau)} \text{Prob}^{\sigma_\varepsilon}(o) \\
&\leq \alpha_{\max} - \text{Val}_G + \varepsilon
\end{aligned}$$

since the sum is equal to the probability that  $\pi$  attacks at all against  $\sigma_\varepsilon$ , which is at most 1. Hence,  $\mathbb{E}U_D(\sigma_\varepsilon, \pi) \geq \text{Val}_G - \varepsilon$  and we are done.  $\square$

## References

- T. Brázdil, P. Hliněný, A. Kučera, V. Řehák, and M. Abaffy. Strategy synthesis in adversarial patrolling games. *CoRR*, abs/1507.03407, 2015.
